# Supplementary material for: Exploiting Partial Solubility in Partially Fluorinated Thermoplastic Blends to Improve Adhesion during Fused Deposition Modeling
Source: MDPI journal article supplement (doi:10.3390/ma15228062), 2022-11-15
Supplement: s1 [file s1]

## Supporting Information: Diffusion Phenomena of Fluorinated Thermoplastic Blends in Fused Deposition Modeling

Pau Saldaña Baqué<sup>1</sup>, Jared W. Strutton<sup>1</sup>, Rahul Shankar<sup>2</sup>, Sarah E. Morgan<sup>2</sup>, and Jena M. McCollum<sup>1\*</sup>

<sup>1</sup>University of Colorado Colorado Springs, Department of Mechanical and Aerospace Engineering, Colorado Springs, Colorado 80918, USA

<sup>2</sup>University of Southern Mississippi, School of Polymer Science and Engineering, Hattiesburg, Mississippi 39406, USA

\*correspondence email: [jmccollu@uccs.edu](mailto:jmccollu@uccs.edu)

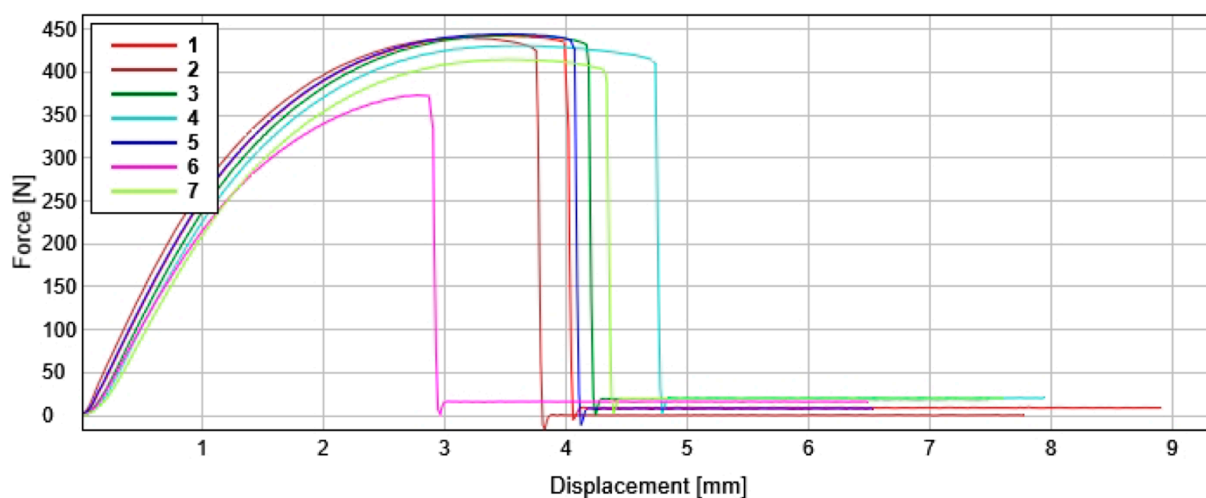

**Figure S1.** Stress-strain curves for 3D-Printed PMMA0

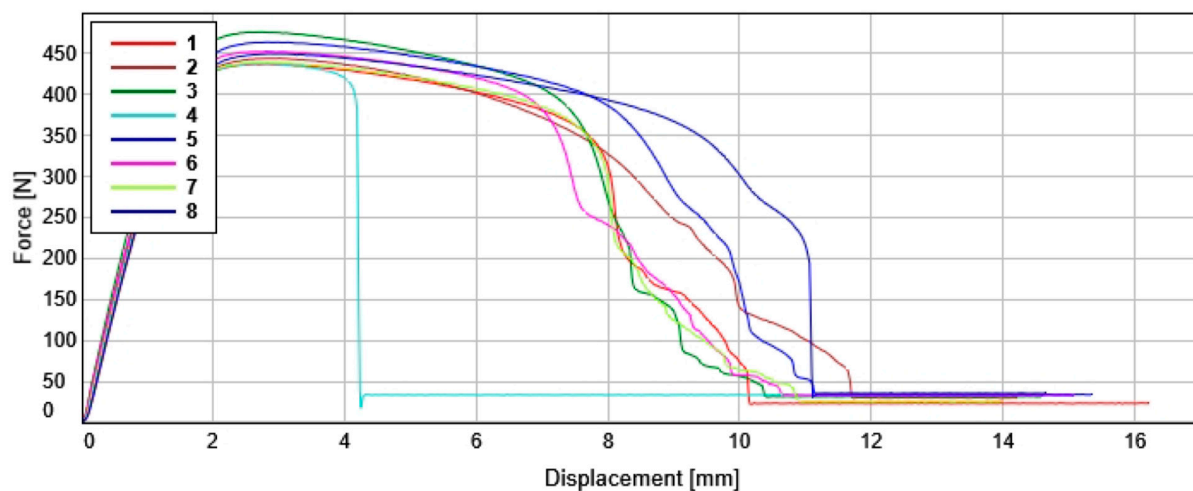

**Figure S2.** Stress-strain curves for 3D-Printed PMMA15

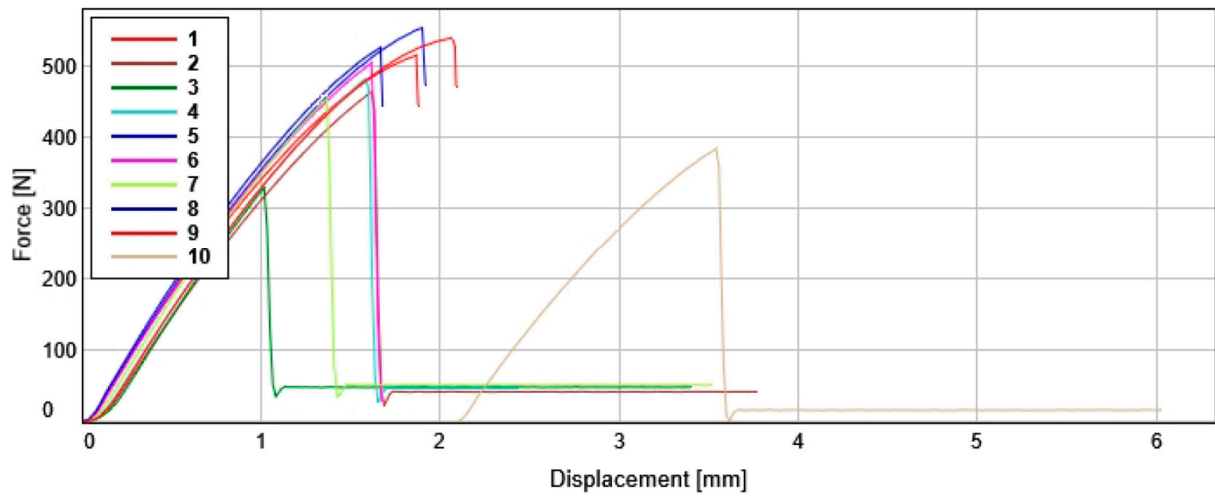

*Figure S3. Stress-strain curves for 3D-Printed PMMA25*

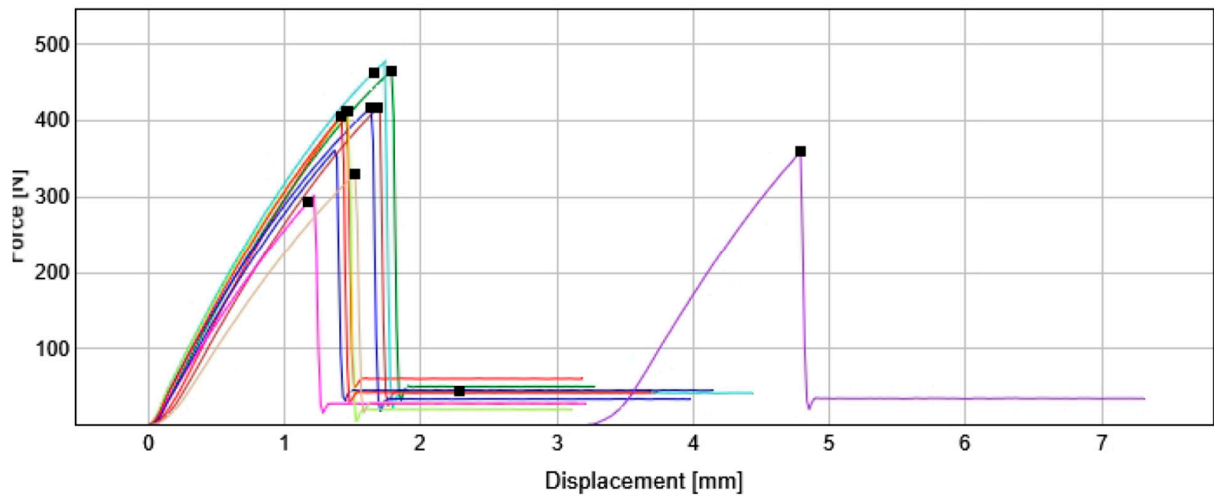

*Figure S4. Stress-strain curves for 3D-Printed PMMA50*

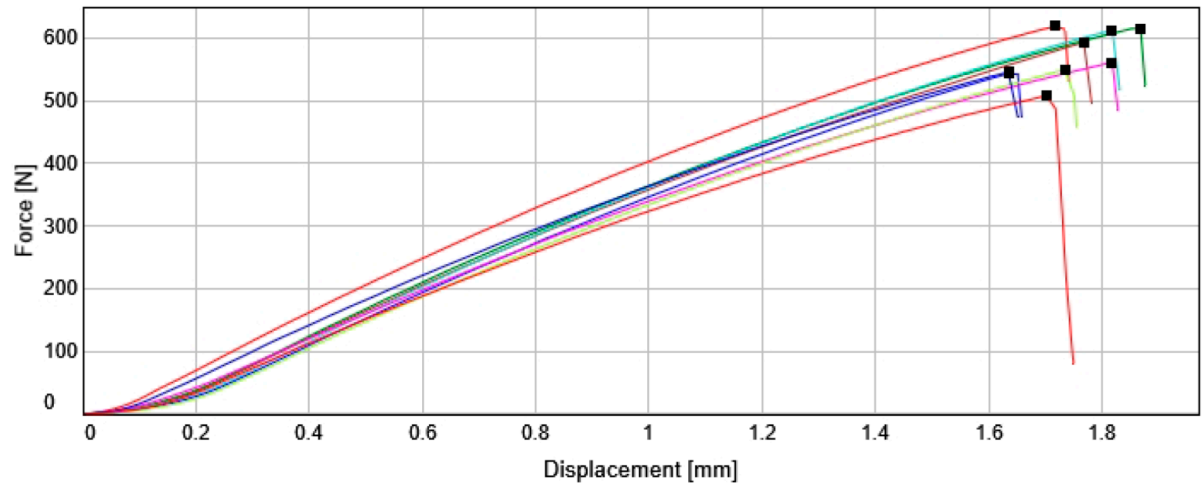

*Figure S5. Stress-strain curves for 3D-Printed PMMA75*

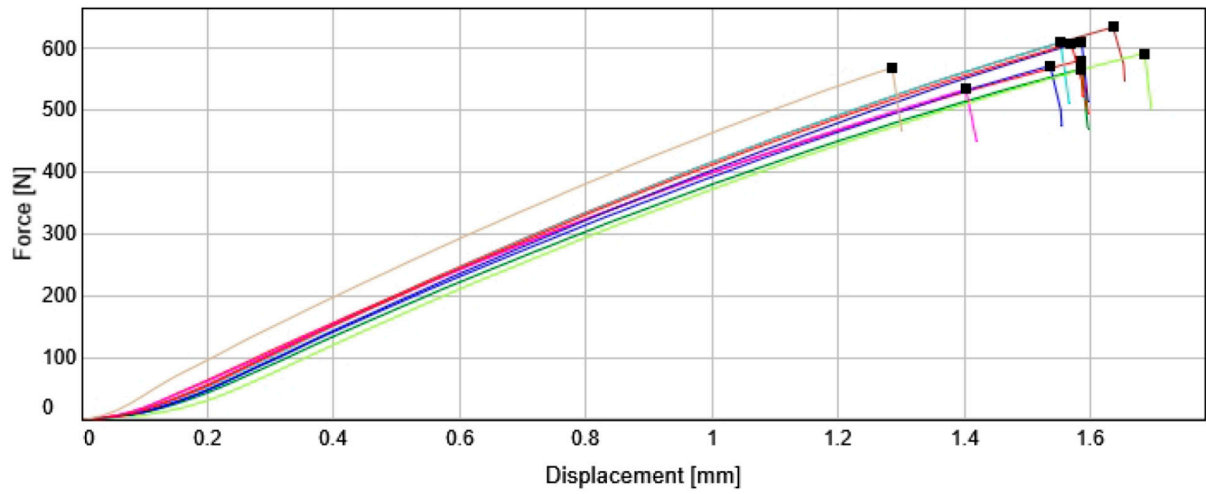

*Figure S6. Stress-strain curves for 3D-Printed PMMA85*

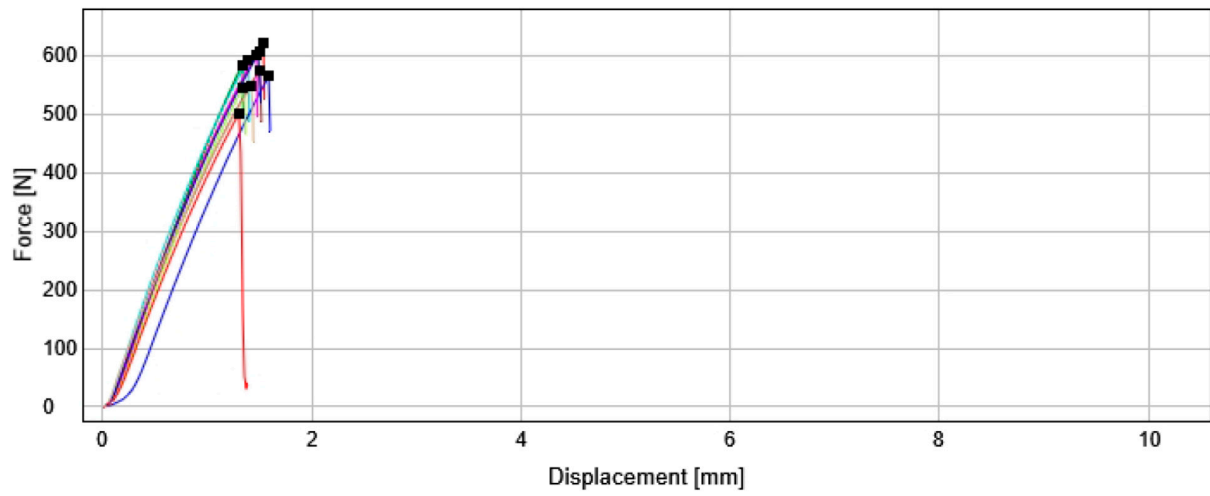

**Figure S7.** Stress-strain curves for 3D-Printed PMMA100

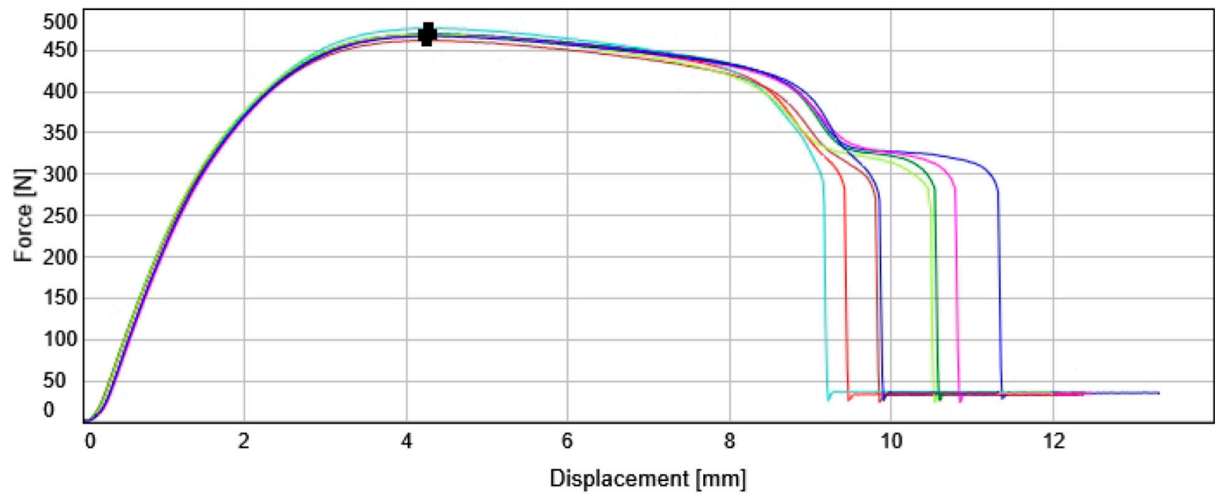

**Figure S8.** Stress-strain curves for Injection-Molded PMMA0

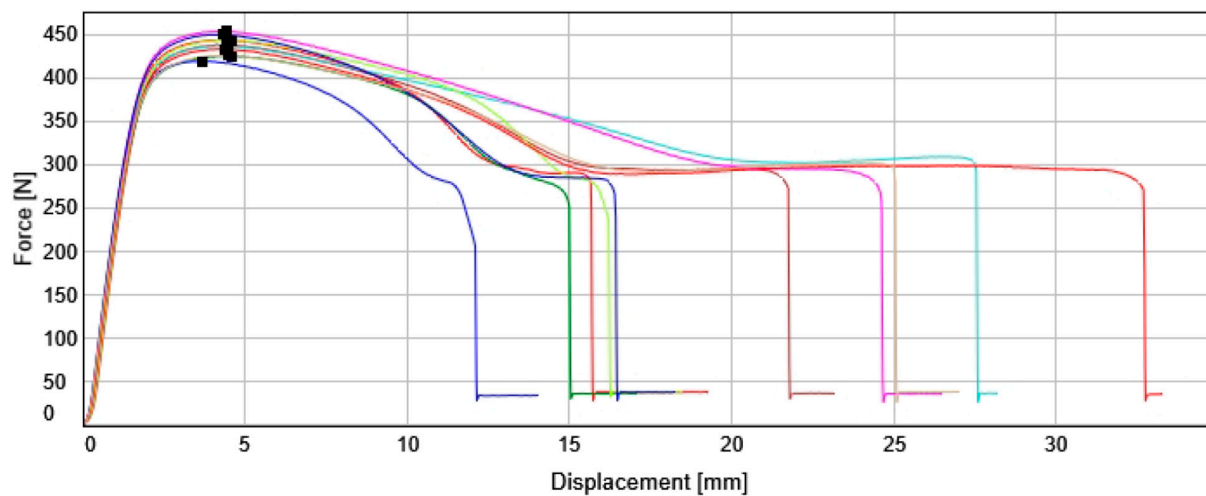

*Figure S9. Stress-strain curves for Injection-Molded PMMA15*

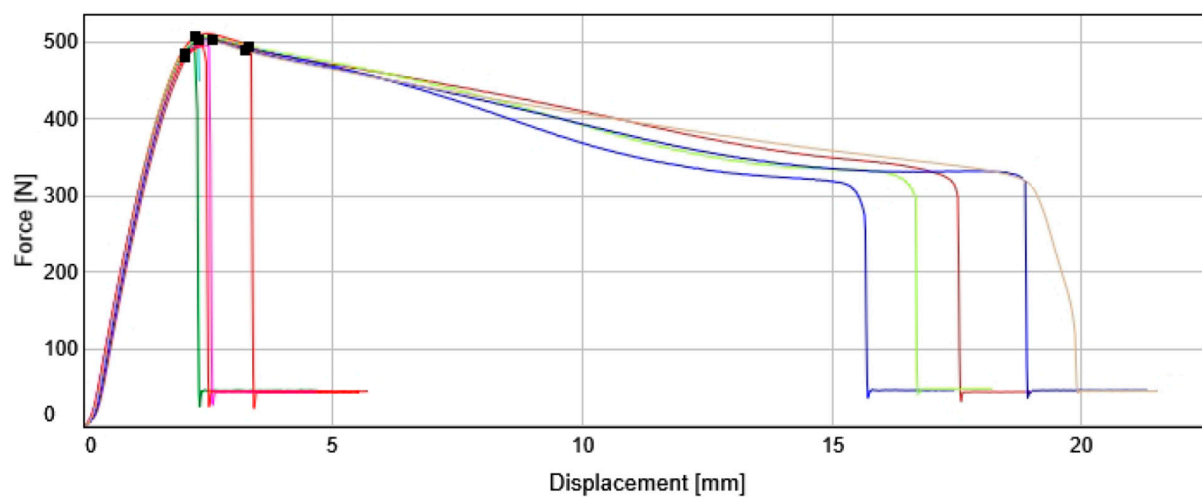

*Figure S10. Stress-strain curves for Injection-Molded PMMA25*

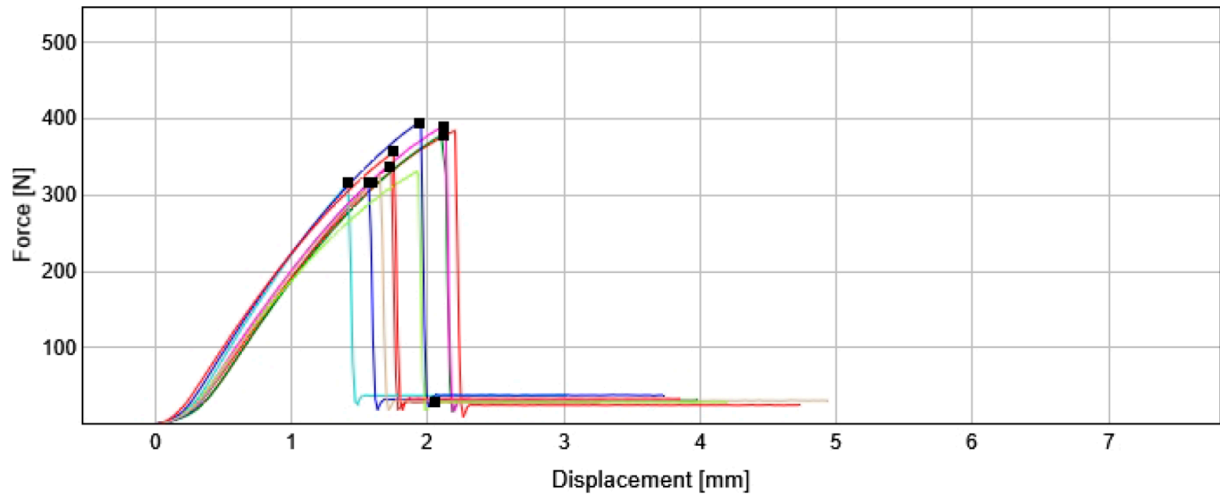

*Figure S11. Stress-strain curves for Injection-Molded PMMA50*

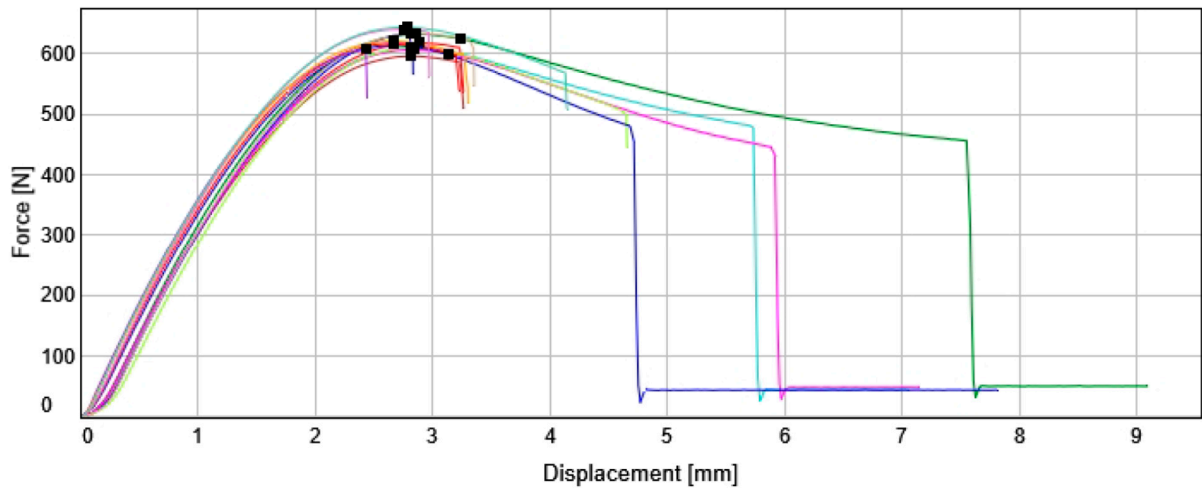

*Figure S12. Stress-strain curves for Injection-Molded PMMA75*

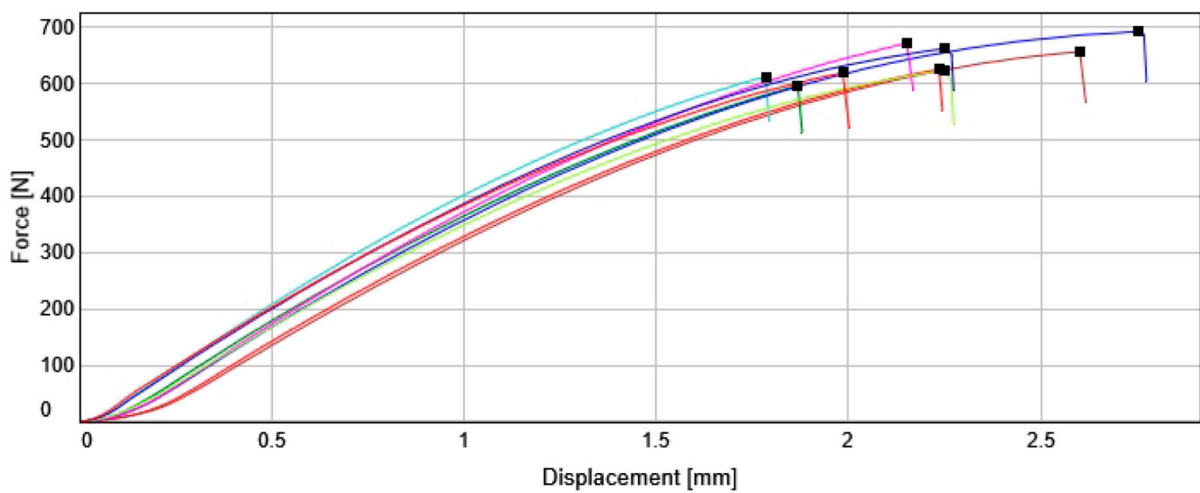

*Figure S13. Stress-strain curves for Injection-Molded PMMA85*

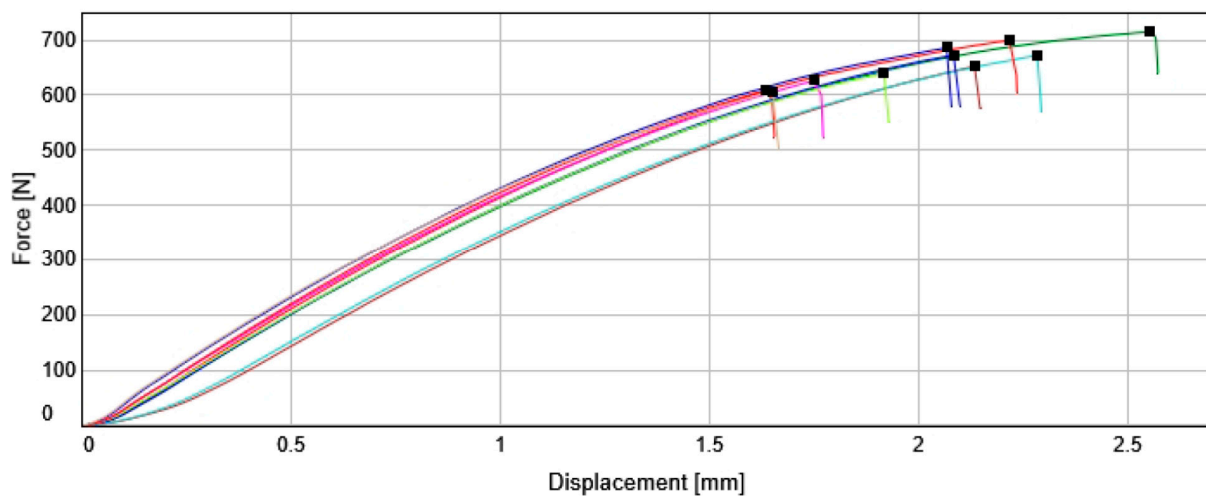

**Figure S14.** Stress-strain curves for Injection-Molded PMMA100

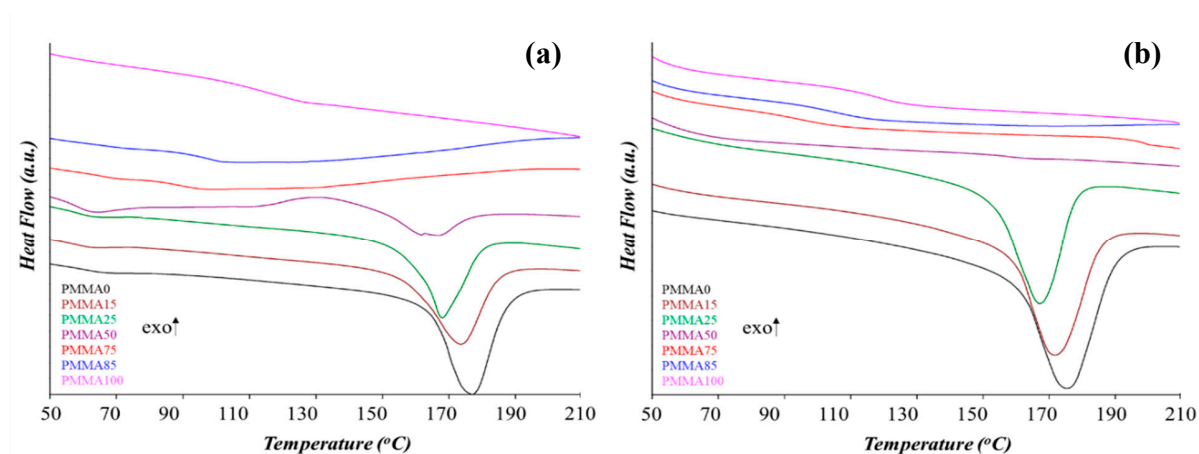

**Figure S15.** DSC traces for 3D printed samples undergoing the (a) first heating cycle and (b) second heating cycle. Data are summarized in Tables 2 and S1.

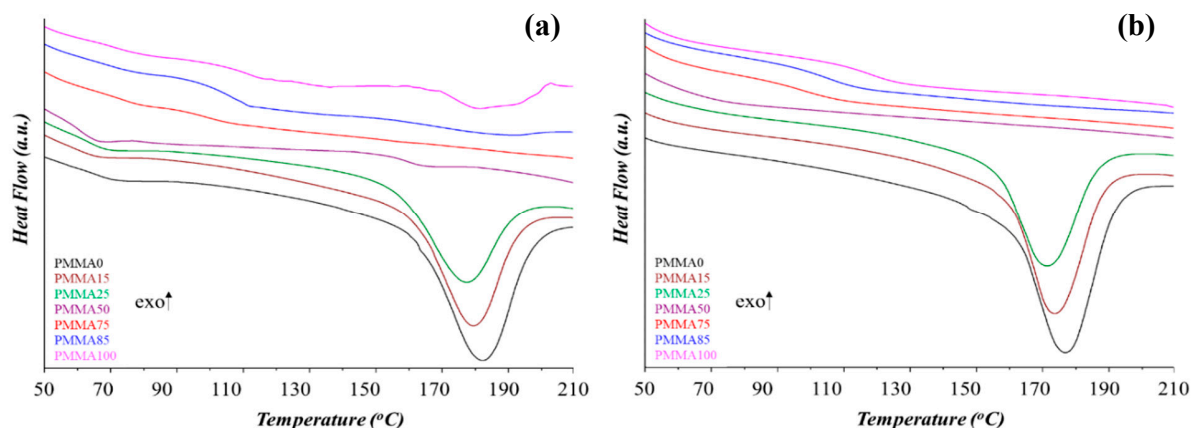

**Figure S16.** DSC traces for twin-screw extruded samples (filament) undergoing the (a) first heating cycle and (b) second heating cycle. Data are summarized in Tables 2 and S1.

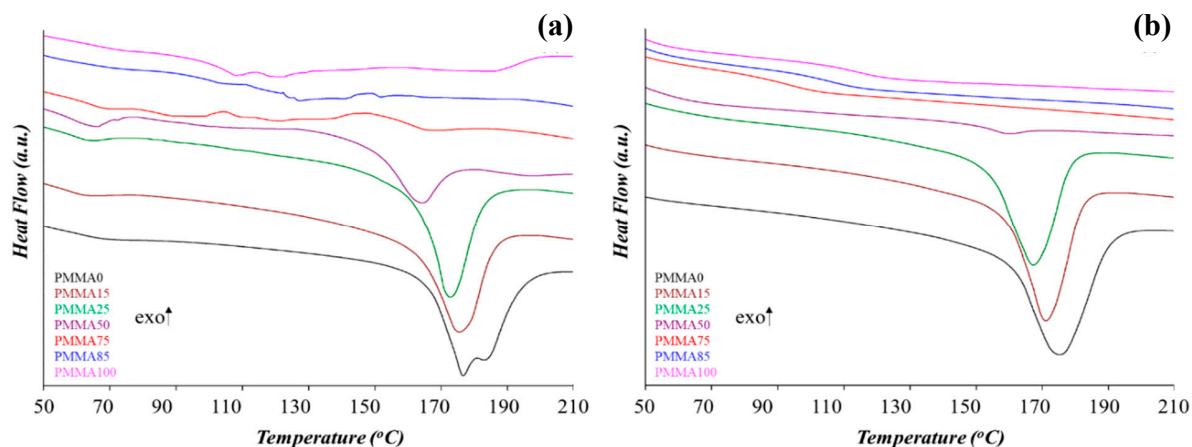

**Figure S17.** DSC traces for injection molded samples undergoing the (a) first heating cycle and (b) second heating cycle. Data are summarized in Tables 2 and S1.

Table S1. Glass transition ( $T_g$ ), melting temperature ( $T_m$ ), melting enthalpy ( $H_m$ ), and crystallization ( $X_c$ ) for the second DSC heating cycle.

| Filament | 3D Printed |       |       |       | IM    |       |       |       | Filament |       |       |       |
|----------|------------|-------|-------|-------|-------|-------|-------|-------|----------|-------|-------|-------|
|          | $T_g$      | $T_m$ | $H_m$ | $X_c$ | $T_g$ | $T_m$ | $H_m$ | $X_c$ | $T_g$    | $T_m$ | $H_m$ | $X_c$ |
|          | (°C)       | (°C)  | (J/g) |       | (°C)  | (°C)  | (J/g) |       | (°C)     | (°C)  | (J/g) |       |
| PMMA0    |            | 158   | 57.8  | 55%   |       | 159   | 44.4  | 42%   |          | 158   | 54.4  | 52%   |
| PMMA15   |            | 157   | 44.6  | 50%   |       | 159   | 34.5  | 39%   |          | 158   | 41.8  | 47%   |
| PMMA25   |            | 152   | 36.7  | 47%   |       | 153   | 31.7  | 40%   |          | 154   | 35.4  | 45%   |
| PMMA50   |            |       |       | 0%    |       | 149   | 2.0   | 4%    |          |       |       | 0%    |



|                 |     |    |     |    |     |    |
|-----------------|-----|----|-----|----|-----|----|
| <i>PMMA</i> 75  | 95  | 0% | 93  | 0% | 99  | 0% |
| <i>PMMA</i> 85  | 106 | 0% | 106 | 0% | 105 | 0% |
| <i>PMMA</i> 100 | 118 | 0% | 115 | 0% | 118 | 0% |

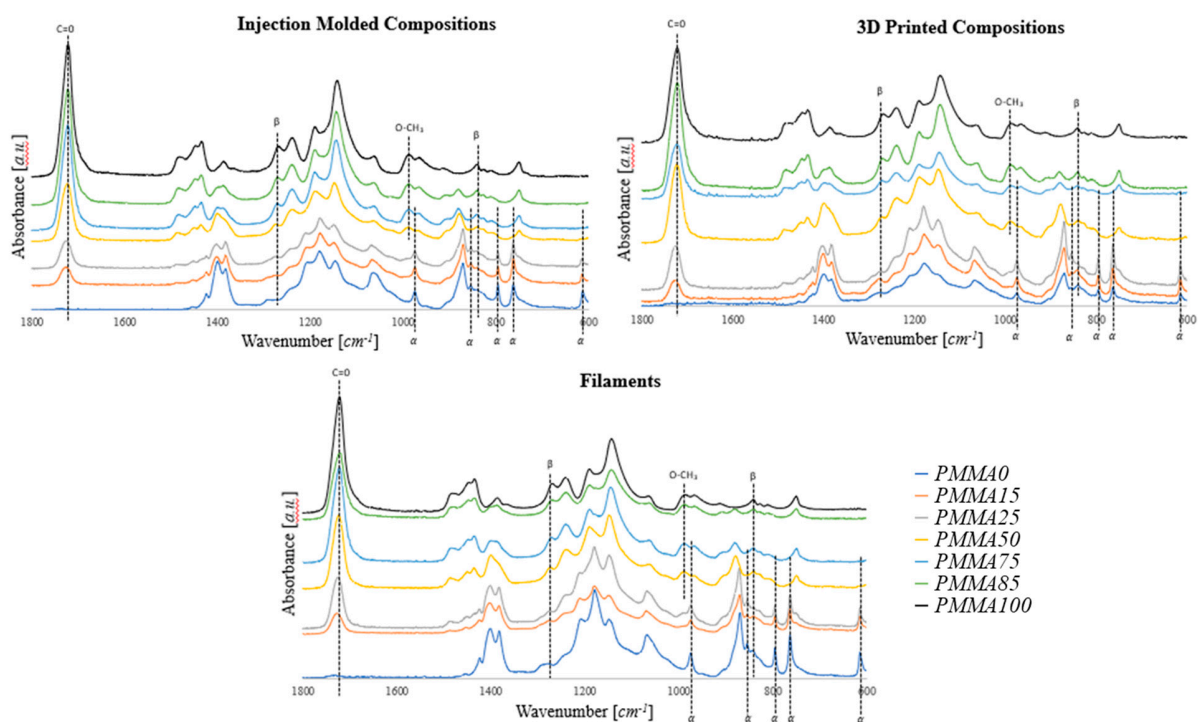

**Figure S18.** FTIR spectra of PVDF/PMMA blends processed by (a) injection-molding, (b) 3D printing and (c) twin-screw extrusion (filament).

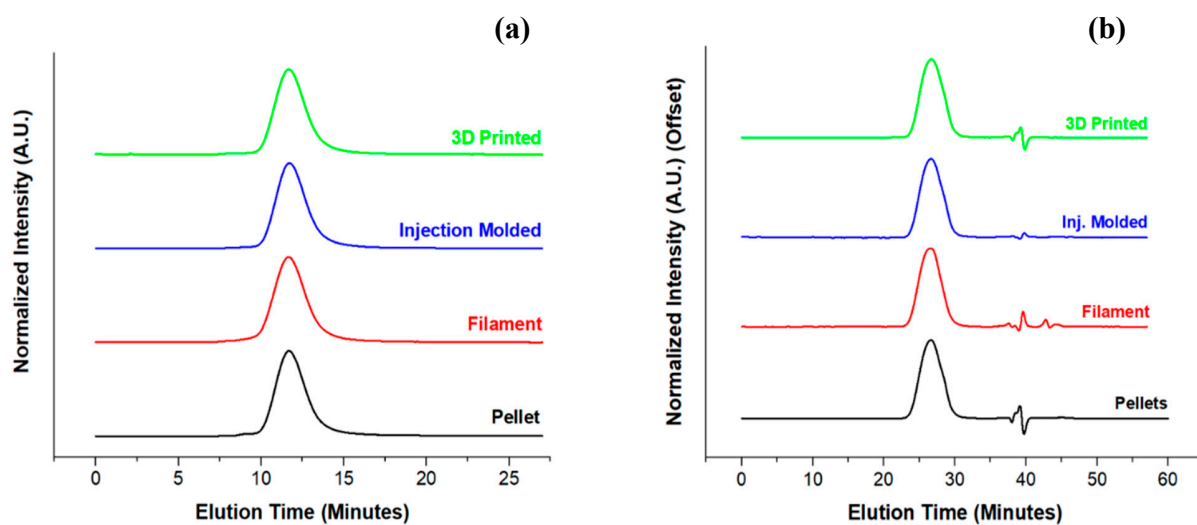

**Figure S19.** GPC curves of (a) PMMA and (b) PVDF for virgin (pellet) and processed (filament, injection-molded, and 3D printed) samples. Data are summarized in Tables 4 and 5.
